# Supplementary material for: Relationship between Physical Performance and Frailty Syndrome in Older Adults: The Mediating Role of Physical Activity, Sedentary Time and Body Composition
Source: MDPI journal article supplement (doi:10.3390/ijerph18010203), 2020-12-29
Supplement: s1 [file s1]

**Supplementary File 1.** Simple mediation models of the associations between physical fitness (SPPB) and frailty (modified FTS), with movement behaviors and body composition as independent mediators in older adults.

- a. Association between SPPB and modified FTS mediated by sedentary time (ST);
- b. Association between SPPB and modified FTS mediated by moderate-to-vigorous physical activity (MVPA);
- c. Association between SPPB and modified FTS mediated by fat index (FI);
- d. Association between SPPB and modified FTS mediated by skeletal muscle index (SMI). \* $p < 0.05$ ; \*\* $p < 0.001$ . FTS\*: modified FTS with variables included in the SPPB removed. All models were adjusted for age, sex and educational status.

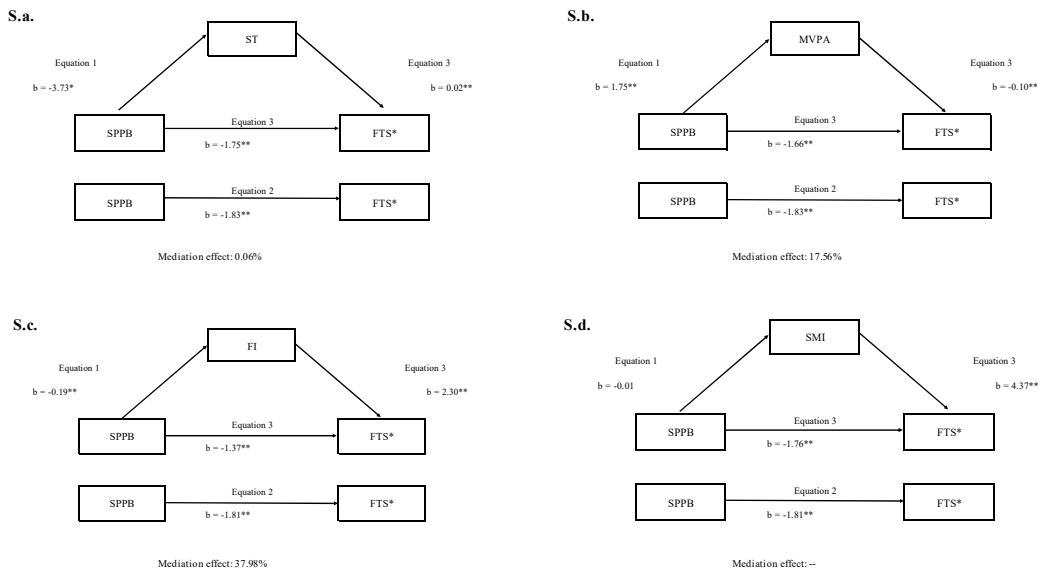

**Supplementary File 2.** Multiple mediation model of the association between physical fitness (SPPB) and frailty (modified FTS), with moderate-to-vigorous physical activity (MVPA) and fat index (FI) as mediators in older adults.

\* $p < 0.05$ ; \*\* $p < 0.001$ . FTS\*: modified FTS with variables included in the SPPB removed.

Model was adjusted for age, sex and educational

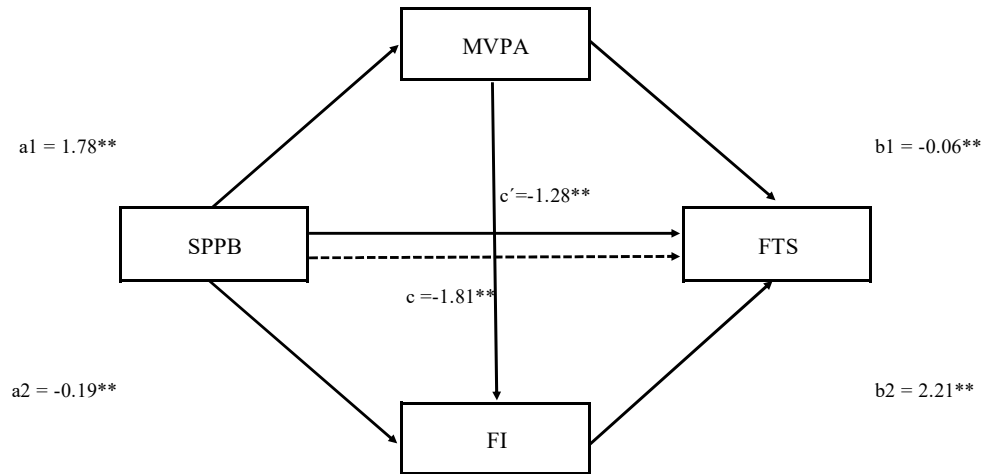

Mediation effect: 40.41%

|                                 | <b>Coefficient</b> | <b>s.e.</b> | <b>p</b> | <b>Bootstrap 95%CI</b> |
|---------------------------------|--------------------|-------------|----------|------------------------|
| Total effect (c Path)           | -1,81              | 0,18        | 0,00     | (-2.17; -1.46)         |
| Direct effect (c' Path)         | -1,28              | 0,16        | 0,00     | (-1.59; -0.97)         |
| Indirect effect (via mediators) | -0,53              | 0,11        |          | (-0.76; -0.33)         |
| SPPB→MVPA→FTS                   | -0,11              | 0,04        |          | (-0.20; -0.05)         |
| SPPB→MVPA→FI→FTS                | 0,31               | 0,11        |          | (0.10; 0.53)           |
| SPPB→FI→FTS                     | -0,42              | 0,1         |          | (-0.63; -0.23)         |

1 **Supplemental File 3** There is an established infrastructure, including a website (<http://www.ciberfes.es/>) and a review committee, through which data requests are  
 2 handled. The hospital reviews and determines the purposes for the data requests and what data can be released. Data requests can be sent to: Research and teaching unit, Virgen  
 3 del Valle Hospital Ctra. Cobisa S/N, 45071 Toledo – Spain, [info@estudiotoledo.com](mailto:info@estudiotoledo.com).

4 . Frailty differences according to physical function (SPPB), sedentary time (ST), moderate-to-vigorous physical activity (MVPA), fat index (FI)  
 5 and skeletal muscle index (SMI) categories.

| Model | SPPB           |                 | ST             |                   |                 | MVPA           |                   |                 |
|-------|----------------|-----------------|----------------|-------------------|-----------------|----------------|-------------------|-----------------|
|       | Low<br>(n=412) | High<br>(n=332) | Low<br>(n=194) | Medium<br>(n=388) | High<br>(n=194) | Low<br>(n=194) | Medium<br>(n=388) | High<br>(n=194) |
| 1     | 43.9 ± 0.6     | 30.4 ± 0.7*     | 35.1 ± 1.0     | 37.3 ± 0.7        | 42.2 ± 1.0*†    | 43.9 ± 1.0     | 37.9 ± 0.7        | 32.6 ± 1.0*†    |
| 2     | 43.7 ± 0.6     | 30.5 ± 0.7*     | -              | -                 | -               | 43.1 ± 1.0     | 38.0 ± 0.7        | 33.0 ± 1.0*†    |
| 3     | 43.2 ± 0.6     | 31.2 ± 0.7*     | 35.9 ± 1.0     | 37.4 ± 0.7        | 41.2 ± 1.0*†    | -              | -                 | -               |
| 4     | 42.8 ± 0.5     | 31.6 ± 0.6*     | 37.2 ± 0.9     | 37.0 ± 0.6        | 40.5 ± 0.9*†    | 42.2 ± 0.9     | 37.6 ± 0.6        | 34.0 ± 0.9*†    |
| 5     | 42.8 ± 0.5     | 31.6 ± 0.6*     | 37.2 ± 0.9     | 37.1 ± 0.6        | 40.5 ± 0.9*†    | 42.2 ± 0.9     | 37.6 ± 0.6        | 34.0 ± 0.9*†    |
| 6     | -              | -               | 37.0 ± 0.7     | 37.5 ± 0.5        | 39.3 ± 0.7      | 40.4 ± 0.8     | 37.4 ± 0.5        | 36.0 ± 0.7*†    |

| Model | FI             |                   |                 | SMI            |                   |                 |
|-------|----------------|-------------------|-----------------|----------------|-------------------|-----------------|
|       | Low<br>(n=193) | Medium<br>(n=388) | High<br>(n=193) | Low<br>(n=193) | Medium<br>(n=388) | High<br>(n=193) |
| 1     | 28.3 ± 1.0     | 37.5 ± 0.6        | 48.6 ± 1.0*†    | 32.3 ± 1.1     | 38.0 ± 0.7        | 43.1 ± 1.0*†    |
| 2     | 28.7 ± 1.0     | 37.5 ± 0.6        | 48.2 ± 1.0*†    | 32.5 ± 1.0     | 38.1 ± 0.7        | 42.8 ± 1.0*†    |
| 3     | 29.5 ± 1.0     | 37.3 ± 0.6        | 47.9 ± 1.0*†    | 32.7 ± 1.0     | 38.3 ± 0.6        | 42.3 ± 1.0*†    |
| 4     | -              | -                 | -               | 38.0 ± 1.0     | 37.8 ± 0.6        | 38.0 ± 1.0      |
| 5     | 29.7 ± 1.0     | 37.3 ± 0.6        | 47.5 ± 1.1*†    | -              | -                 | -               |
| 6     | 30.9 ± 0.8     | 37.6 ± 0.5        | 45.5 ± 0.9*†    | 37.5 ± 0.9     | 37.5 ± 0.5        | 38.7 ± 0.8      |

11 Data are ± SEM.

12 Covariates for each model: Model 1 (age, sex and educational status); Model 2 (Model 1+ ST); Model 3 (Model 2 + MVPA); Model 4 (Model 3 +  
13 FI); Model 5 (Model 4 + SMI); Model 6 (Model 5 + SPPB).  
14 \*  $p < 0.05$  for High group vs. Low group. †  $p < 0.05$  for High group vs. Medium group.  $\theta$   $p < 0.05$  for Medium group vs. Low group.  
15
